# Supplementary material for: Integrated biogeography of planktonic and sedimentary bacterial communities in the Yangtze River
Source: Microbiome. 2018 Jan 19;6:16. doi: 10.1186/s40168-017-0388-x (PMC5775685; doi:10.1186/s40168-017-0388-x)
Supplement: Supplementary file 16 — Dissimilarity values within and between groups for water-autumn samples. The samples are grouped by seasons and landform types. (XLSX 9 kb) [file 40168_2017_388_MOESM16_ESM.xlsx]

## Sheet: Table S5
Additional File 16: Table S6. Dissimilarity values within and between groups for water-autumn samples.
	Mountain	Foothill	Basin	Foothill_mountain	Plain
Mountain	0.6451
Foothill	0.7081	0.5344
Basin	0.6627	0.5861	0.5266
Foothill_mountain	0.7355	0.5298	0.5935	0.424
Plain	0.712	0.6046	0.6127	0.5585	0.5539
