# Supplementary material for: Integrated biogeography of planktonic and sedimentary bacterial communities in the Yangtze River
Source: Microbiome. 2018 Jan 19;6:16. doi: 10.1186/s40168-017-0388-x (PMC5775685; doi:10.1186/s40168-017-0388-x)
Supplement: Supplementary file 17 — Detailed information on the 50 sampling stations. (XLSX 12 kb) [file 40168_2017_388_MOESM17_ESM.xlsx]

## Sheet: Sheet1
Site number	Site name	Longitude（°E）	Latitude（°N）	Maintream/Tributary
1	SG	99.98	26.88	Maintream
2	PZH	101.7	26.57	Maintream
3	XLD	103.66	28.25	Maintream
4	PS	104.17	28.65	Maintream
5	XJB	104.38	28.65	Maintream
6	YB	104.65	28.77	Maintream
7	LZ	105.55	28.9	Maintream
8	ZT	105.85	29.02	Maintream
9	CT	106.6	29.62	Maintream
10	BD	110.4	31.04	Maintream
11	MH	110.9	30.88	Maintream
12	HLM	111.12	30.85	Maintream
13	YC	111.28	30.69	Maintream
14	SS	112.26	30.29	Maintream
15	CLJL	113.15	29.45	Maintream
16	LS	113.32	29.67	Maintream
17	WH	114.32	30.62	Maintream
18	JJ	116	29.74	Maintream
19	DT	117.64	30.78	Maintream
20	WHU	118.34	31.46	Maintream
21	MAS	118.47	31.77	Maintream
22	NJ	118.94	32.17	Maintream
23	ZJ	119.66	32.18	Maintream
24	XLJ	120.96	31.77	Maintream
25	GC	104.42	28.8	Tributary (Minjiang)
26	WS	106.28	30.35	Tributary (Minjiang)
27	BB	106.46	29.81	Tributary (Minjiang)
28	XHB	105.84	30.18	Tributary (Minjiang)
29	LDX	106.58	30.35	Tributary (Minjiang)
30	WL	107.76	29.33	Tributary (Minjiang)
31	XXT	111.31	30.77	Tributary (Minjiang)
32	YMZ	111.29	30.74	Tributary (Minjiang)
33	CLJ	113.13	29.42	Tributary (Minjiang)
34	NZ	112.29	29.07	Tributary (Minjiang)
35	ZWM	112.06	28.91	Tributary (Minjiang)
36	XYN	112.87	28.67	Tributary (Minjiang)
37	BH	110.11	32.83	Tributary (Minjiang)
38	DJK	111.51	32.51	Tributary (Minjiang)
39	XYA	112.15	32.03	Tributary (Minjiang)
40	XT	113.45	30.38	Tributary (Minjiang)
41	JJZ	114.23	30.57	Tributary (Minjiang)
42	TC	111.66	32.66	Tributary (Minjiang)
43	HK	116.21	29.74	Tributary (Minjiang)
44	PLK	116.44	29.02	Tributary (Minjiang)
45	PSS	116.37	29.08	Tributary (Minjiang)
46	PQX	116.05	29.3	Tributary (Minjiang)
47	PHK	116.22	29.75	Tributary (Minjiang)
48	PXZ	116.04	29.44	Tributary (Minjiang)
49	PDC	116.22	29.21	Tributary (Minjiang)
50	PXHK	116.01	29.18	Tributary (Minjiang)
